# Supplementary material
Source: PubMed Central journal article supplement (PMC7061846)
Supplement: ajtr0012-0507-f7.pdf [file ajtr0012-0507-f7.pdf]

1,25-Dihydroxyvitamin D insufficiency accelerates age-related bone loss

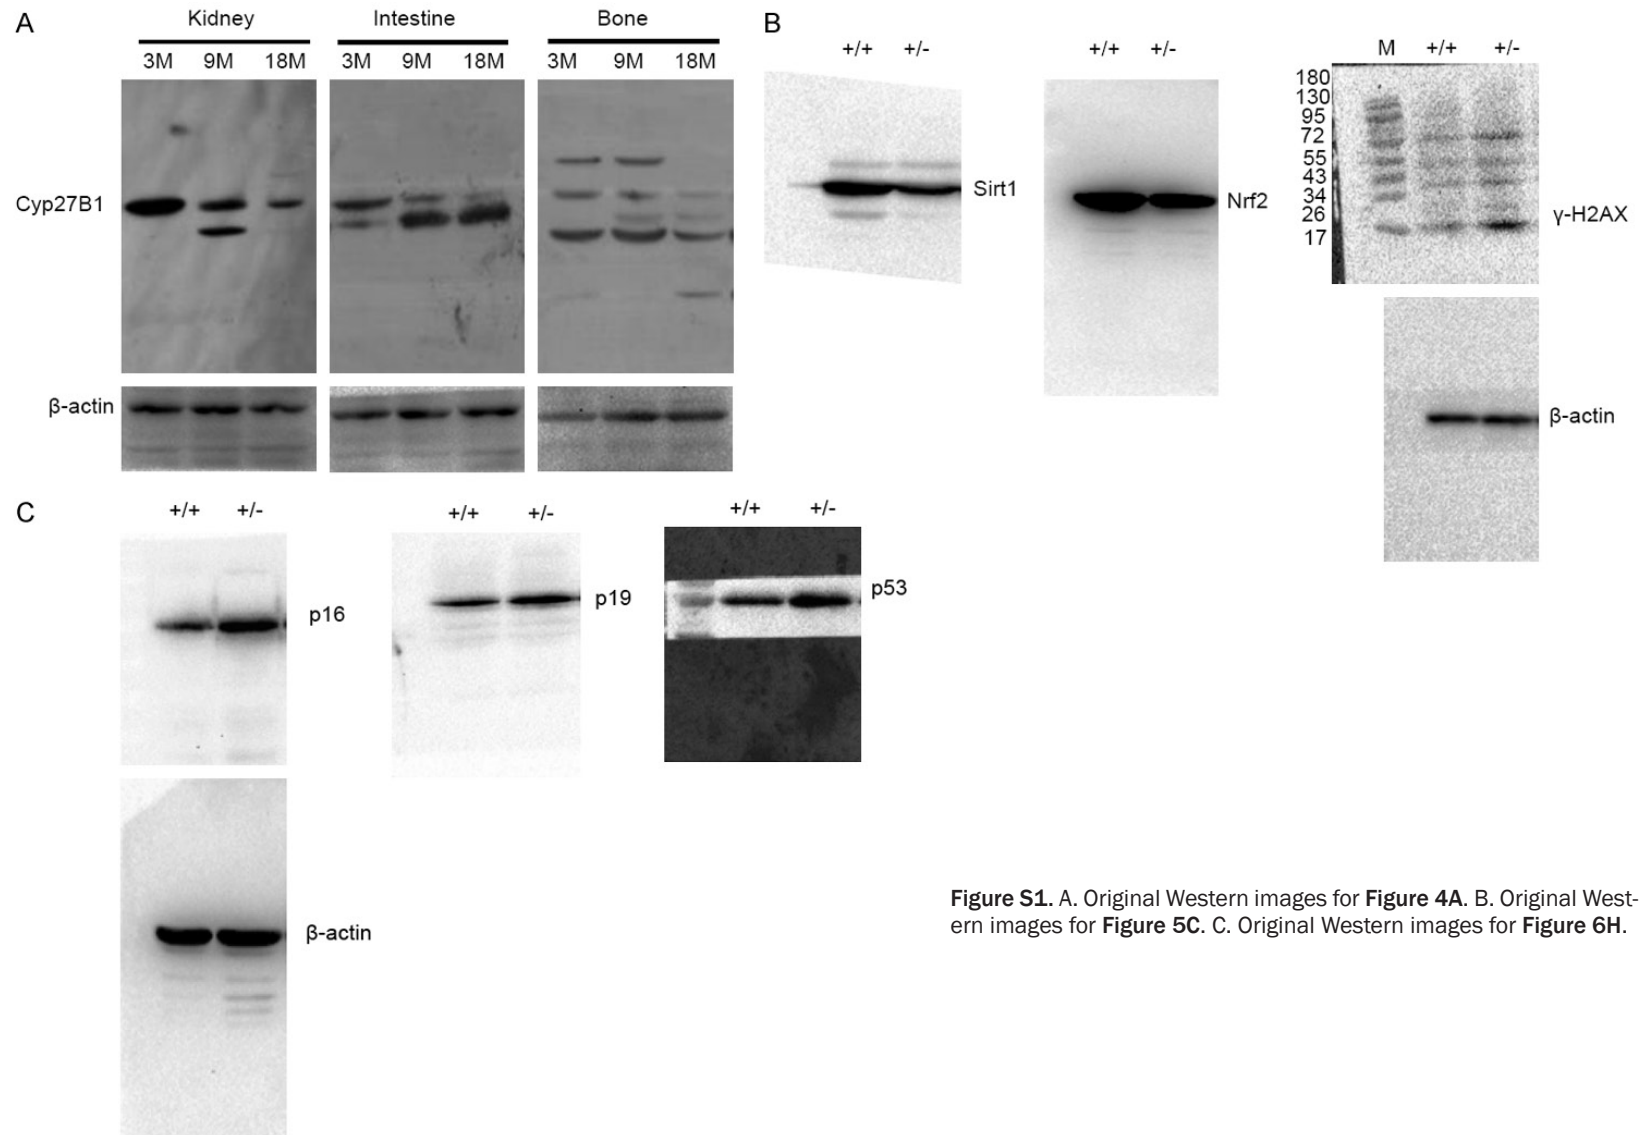

**Figure S1.** A. Original Western images for **Figure 4A**. B. Original Western images for **Figure 5C**. C. Original Western images for **Figure 6H**.
